1 **Deep sequencing of circulating exosomal microRNA allows non-invasive**  
2 **glioblastoma diagnosis**

3

4 Saeideh Ebrahimkhani, Fatemeh Vafae, Susannah Hallal, Heng Wei, Maggie Yuk T.

5 Lee, Paul E. Young, Laveniya Satgunaseelan, Brindha Shivalingam, Catherine M. Suter,

6 Michael E. Buckland and Kimberley L. Kaufman

7 1. Department of Neuropathology, Royal Prince Alfred Hospital, NSW, Australia (SE, HW, ML, LS, MEB, KLK)

8 2. BrainStorm Brain Cancer Research, Brain and Mind Centre, University of Sydney, NSW, Australia (SE, SH,  
9 HW, ML, MEB, KLK)

10 3. Sydney Medical School, University of Sydney, NSW, Australia (SE, SH, MEB)

11 4. School of Biotechnology and Biomolecular Sciences, University of New South Wales, NSW, Australia (FV)

12 5. Division of Molecular Structural and Computational Biology, Victor Chang Cardiac Research Institute, NSW,  
13 Australia (PY, CMS)

14 6. Tissue Pathology and Diagnostic Oncology, Royal Prince Alfred Hospital, NSW, Australia (LS)

15 7. Department of Neurosurgery, Chris O'Brien Lifehouse, NSW, Australia (BS)

16 8. Department of Neurosurgery, Royal Prince Alfred Hospital, NSW, Australia (BS)

17 9. Faculty of Medicine, University of New South Wales, NSW, Australia (CMS)

18 10. School of Life and Environmental Sciences, University of Sydney, NSW, Australia (KLK)

19

20 *Running title:* Serum exosomal miRNAs in glioblastoma diagnosis

21

22 *Corresponding Author:* Clinical A/Professor Michael E. Buckland

23 RPAH Neuropathology Department, Brain and Mind Centre

24 Level 7 94 Mallett St., Camperdown NSW 2050

25 E: [michael.buckland@sydney.edu.au](mailto:michael.buckland@sydney.edu.au)

26 T: +612 9114 4009 F: +612 9114 4020

27

28 This article was previously published as a preprint on bioRxiv

29 <https://doi.org/10.1101/342154>

30

31 *Manuscript word count*, 4244

32 *Abstract*, 243; *References*, 36; *Figure legends*, 533.

33 *Keywords:* glioblastoma; exosomes; microRNA; glioma; liquid biopsy

34 ABSTRACT

35 Exosomes are nano-sized extracellular vesicles released by many cells that contain  
36 molecules characteristic of their cell-of-origin, including microRNA. Exosomes released  
37 by glioblastoma cross the blood-brain-barrier into the peripheral circulation, and carry  
38 molecular cargo distinct to that of ‘free-circulating’ miRNA. In this pilot study, serum  
39 exosomal-microRNAs were isolated from glioblastoma ( $n=12$ ) patients and analyzed  
40 using unbiased deep sequencing. Results were compared to sera from age- and gender-  
41 matched healthy controls, and to grades II-III ( $n=10$ ) glioma patients. Significant  
42 differentially expressed microRNAs were identified, and the predictive power of  
43 individual and subsets of microRNAs were tested using univariate and multivariate  
44 analyses. Additional sera from glioblastoma patients ( $n=4$ ) and independent sets of  
45 healthy ( $n=9$ ) and non-glioma ( $n=10$ ) controls were used to further test the specificity and  
46 predictive power of this unique exosomal-microRNA signature. Twenty-six microRNAs  
47 were differentially expressed in serum exosomes from glioblastoma patients’ relative to  
48 healthy controls. Random forest modeling and data partitioning selected seven miRNAs  
49 (miR-182-5p, miR-328-3p, miR-339-5p, miR-340-5p, miR-485-3p, miR-486-5p and  
50 miR-543) as the most stable for classifying glioblastoma. Strikingly, within this model,  
51 **six** iterations of these miRNA classifiers could distinguish glioblastoma patients from  
52 controls with perfect accuracy. The seven-miRNA panel was able to correctly classify  
53 all specimens in validation cohorts ( $n=23$ ). Also identified were 23 dysregulated  
54 miRNAs in IDH<sup>MUT</sup> gliomas, a partially overlapping yet distinct signature of lower  
55 grade glioma. Serum exosomal-miRNA signatures can accurately diagnose glioblastoma  
56 preoperatively. miRNA signatures identified are distinct from previously reported ‘free-  
57 circulating’ miRNA studies in GBM patients, and appear to be superior.

58

59 INTRODUCTION

60 Malignant gliomas, particularly glioblastoma (GBM), represent the most lethal primary  
61 brain tumors, owing in part to their highly infiltrative growth patterns. The World Health  
62 Organization (WHO) guidelines sub-categorize glioma by histopathologic evaluation into  
63 tumor grades I-IV, where GBM (grade IV) is the most aggressive and also the most  
64 common. Despite surgery, radiation, and chemotherapy, essentially all GBM tumors  
65 recur, at which point patients have reduced treatment options and worsening prognoses.  
66 Compounding this aggressive cancer phenotype are challenges in monitoring responses to  
67 treatment and tumor progression. While recent revisions to the Response Assessment in  
68 Neuro-Oncology (RANO) criteria helps to standardize glioma tumor monitoring<sup>1</sup>,  
69 radiographic measurements can be unreliable and insensitive to early signs of treatment  
70 failure and tumor relapse. Moreover, there are still difficulties deciphering pseudo-  
71 progression and pseudo-responses in some patients. Brain biopsy and histologic analysis  
72 can provide definitive diagnoses and evaluation of disease progression, however serial  
73 biopsies are impractical given the cumulative surgical risk, and biopsied tissue may not  
74 reflect the heterogeneity of GBM tumors.

75

76 An important step towards the provision of personalized GBM patient care is the ability to  
77 assess tumors *in-situ*. As such, there is a real need for biomarkers that can measure  
78 disease burden and treatment responses in GBM patients in a safe, accurate and timely  
79 manner, and preferably before changes become clinically apparent. The recently  
80 popularized idea of ‘liquid biopsy’ presents an ideal approach to monitor GBM tumor  
81 load and evolution in response to treatment. If developed and implemented alongside new  
82 treatments, such tests would provide useful surrogate endpoints and allow clinical trial  
83 protocols to be more dynamic and adaptive.

84 Exosomes are nano-sized (30-100 nm) membrane-bound extracellular vesicles released by  
85 all cells in both health and disease, and there is growing interest in their use as non-  
86 invasive biomarkers for disease diagnosis and monitoring of disease recurrence<sup>2</sup>. GBM-  
87 derived exosomes circulate in the peripheral blood of patients, and can contain diagnostic  
88 nucleic acid<sup>3</sup>. We recently described a GBM exosome protein signature<sup>4</sup> and also showed  
89 that GBM exosomes contain abundant, selectively packaged small non-coding RNAs  
90 (sncRNAs)<sup>5</sup>. Using unbiased sncRNA deep sequencing, we identified several unusual  
91 and/or completely novel sncRNAs within GBM exosomes *in vitro* as well as an  
92 enrichment of microRNA (miRNA) implicated in oncogenesis, including miR-23a, miR-  
93 30a, miR-221 and miR-451<sup>5</sup>. Thus, while GBM exosomal miRNA contents broadly  
94 reflect their cell of origin, there is a unique profile of miRNAs within exosomes.

95  
96 Some studies of exosomal miRNA in GBM patients have already been reported; these  
97 studies utilized methods that focused on pre-defined and relatively small groups of  
98 miRNA species. One previous study found that miR-21 levels in CSF exosomes of GBM  
99 patients were up-regulated 10-fold compared to controls<sup>6</sup>, while another reported that  
100 serum exosomal miR-320, mir-547-3p, and RNU6-1 were significantly associated with  
101 GBM diagnosis, as well as outcome (RNU6-1)<sup>7</sup>. However, to date no comprehensive  
102 analysis of the entire miRNA repertoire of serum exosomes in glioma patients has been  
103 performed. Here, we have used unbiased next generation sequencing and an integrative  
104 bioinformatics pipeline<sup>8</sup> to assay the complete repertoire of exosomal-associated miRNAs  
105 in the serum of patients with glioblastoma, lower grade gliomas, and healthy controls. We  
106 describe a novel miRNA signature within serum exosomes that is highly predictive of pre-  
107 operative GBM diagnosis. Furthermore, we show that this approach has potential for  
108 describing unique miRNA signatures for distinct glioma entities.

109 RESULTS

110 *Characterization of serum exosomes isolated prior to miRNA sequencing*

111 Serum exosomes were isolated by size exclusion chromatography. The combined elution  
112 fractions 8-10 showed particle sizes with a mean diameter  $89.1 \pm 2.5$  nm and modal  
113 diameter of  $81.7 \pm 5.5$  nm (**Fig. 1a**). TEM confirmed the presence of similarly sized  
114 particles with vesicular morphologies, characteristic of exosomes (**Fig. 1b**). MS analysis  
115 confidently identified 1167, 861 and 636 proteins in qEV elution fractions 8, 9 and 10  
116 from healthy serum, respectively (**Supp. Table 2**). Overall, 87 of the top 100 proteins  
117 commonly identified in exosomes were confidently sequenced across the three fractions,  
118 including all top 10 exosomal proteins (**Fig. 1c-1**). Primary sub-cellular localizations  
119 included significant enrichments of ‘exosome’ and ‘blood microparticle’ related proteins  
120 across all fractions, with minimal contamination from other compartments, including the  
121 nucleolus (**Fig. 1c-2**) where certain miRNAs show specific nuclear enrichment<sup>9</sup>. Prior to  
122 RNA extraction, serums were treated with RNaseA to remove circulating RNAs that may  
123 confound measurements of exosomal RNAs<sup>8</sup>. RNA extracted from each sample yielded  
124 profiles typical for exosomes, showing an absence of ribosomal RNA and enrichment of  
125 small (<200 nt) RNA species (**Fig. 1d**).

126

127 *Insert Figure 1 here*

128

129 *Differentially expressed exosomal miRNAs in GBM patient sera*

130 Circulating exosomal miRNA profiles from patients with histopathologically confirmed  
131 IDH<sup>WT</sup> GBM ( $n=12$ ) were compared to age- and gender-matched healthy controls ( $n=12$ ;  
132 see **Table 1A** for discovery cohorts; **Table 1B** for validation cases). We employed three  
133 statistical approaches (Student’s *t*-test, Fisher’s exact, Wilcoxon rank sum) to identify a

134 discovery set of differentially expressed miRNA biomarkers. miRNA biomarkers were  
 135 identified if their differential expression met a fold change  $\geq 2$  in either direction and  
 136 unadjusted  $p$ -values  $\leq 0.05$  in all statistical tests applied. Using this approach, we identified  
 137 26 miRNAs significantly dysregulated between healthy controls and GBM patients  
 138 (**Table 2; Fig. 2-a**; normalized miRNA counts are available in **Supp. Table 3** and  
 139 differential expression analysis in **Supp. Table 4A**).

140

141 **Table 1A:** Overview of cohorts used for discovery miRNA analyses.

142

|                        | <b>GBM, IDH<sup>WT</sup></b> | <b>GBM-matched<br/>HC</b> | <b>GII-III,<br/>IDH<sup>MUT</sup></b> | <b>GII-III-matched<br/>HC</b> |
|------------------------|------------------------------|---------------------------|---------------------------------------|-------------------------------|
| Sample $n$             | 12                           | 12                        | 10                                    | 10                            |
| Age (mean<br>$\pm$ SD) | 63.3 $\pm$ 11.5              | 56.2 $\pm$ 12.4           | 42.9 $\pm$ 12.7                       | 42.7 $\pm$ 10.2               |
| Gender                 | 7M, 5F                       | 7M, 5F                    | 6M, 4F                                | 6M, 4F                        |

143

144

145 **Table 1B:** Additional patients and cohorts used for validation

146

| <b>Patient/cohort</b> | <b>Age</b>      | <b>Gender</b> | <b>Diagnosis</b>                     | <b>Notes</b>                                                                                                                                       |
|-----------------------|-----------------|---------------|--------------------------------------|----------------------------------------------------------------------------------------------------------------------------------------------------|
| GBM1_relapse          | 46              | M             | GBM IV                               | Pre-operative blood taken after recurrence of GBM1 (8-month relapse)                                                                               |
| GBM12_prior           | 45              | F             | GBM IV                               | Pre-operative blood taken before removal of earlier GBM lesion (GBM12; 4.6 months prior)                                                           |
| GBM13                 | 33              | M             | GBM IV                               | Glioblastoma, IDH <sup>MUT</sup> , WHO (2016) grade IV                                                                                             |
| GBM14                 | 56              | M             | <i>high-grade glioma</i>             | No surgery/tissue pathology performed, diagnosis based on repeat MRIs. Overall survival of 8.1 months.                                             |
| GI_C                  | 24              | F             | Ganglioglioma grade I                | GFAP <sup>+</sup> in glial component/ NeuN <sup>+</sup> in neuronal component, IDH1 <sup>WT</sup> , ATRX <sup>+</sup> , BRAF(V600E) <sup>+++</sup> |
| HC ( $n=9$ )          | 36.2 $\pm$ 10.3 | 5F, 4M        | Healthy controls                     | -                                                                                                                                                  |
| MS ( $n=9$ )          | 35.3 $\pm$ 10.4 | 5M, 4F        | Relapse-remitting Multiple Sclerosis | All patients had active lesions; were untreated ( $n=5$ ) or receiving different immunomodulatory therapies ( $n=4$ ).                             |

147

148 *For more detailed demographic, clinical and histopathologic information, please refer to*  
 149 *Supplementary Tables 1A-C. The mean age with standard deviation is provided for each cohort.*  
 150 *Abbreviations: F, female; GBM, glioblastoma; GII-III, glioma grade II-III; GI\_C, Ganglioglioma*  
 151 *grade I control case; HC, healthy controls; M, male; MS, multiple sclerosis control cohort*  
 152

153

154 **Table 2.** Significant dysregulated miRNAs in serum exosomes from glioblastoma (GBM)  
 155 patients ( $n=12$ ) relative to healthy controls (HC;  $n=12$ ).  
 156

| miRNA          | CPM (GBM) | CPM (HC) | FC   | Exact test | <i>t</i> -test | Wilcoxon | Error rate | AUROC | 95% CI of AUROC |
|----------------|-----------|----------|------|------------|----------------|----------|------------|-------|-----------------|
| <b>486-5p</b>  | 25291.6   | 8522.6   | 3.0  | 1.6E-07*   | 4.0E-04*       | 1.0E-04* | 0.149      | 0.924 | (0.823, 1)      |
| <b>182-5p</b>  | 2090.5    | 850.6    | 2.5  | 5.7E-07*   | 3.0E-04*       | 2.0E-04* | 0.151      | 0.917 | (0.808, 1)      |
| <b>486-3p</b>  | 277.4     | 114      | 2.4  | 5.0E-06*   | 0.002*         | 3.0E-04* | 0.149      | 0.910 | (0.791, 1)      |
| <b>378a-3p</b> | 2083.2    | 875.2    | 2.4  | 1.4E-06*   | 0.003*         | 4.0E-04* | 0.158      | 0.903 | (0.783, 1)      |
| <b>183-5p</b>  | 645.8     | 267.9    | 2.4  | 2.0E-05*   | 0.001*         | 0.001*   | 0.176      | 0.882 | (0.749, 1)      |
| <b>501-3p</b>  | 359.6     | 157.3    | 2.3  | 1.1E-05*   | 0.002*         | 0.001*   | 0.161      | 0.875 | (0.726, 1)      |
| <b>20b-5p</b>  | 594.6     | 266.3    | 2.2  | 2.9E-06*   | 0.002*         | 1.0E-04* | 0.133      | 0.938 | (0.834, 1)      |
| <b>106b-3p</b> | 2703.2    | 1215     | 2.2  | 3.9E-06*   | 0.001*         | 0.001*   | 0.160      | 0.889 | (0.752, 1)      |
| <b>629-5p</b>  | 896.8     | 415      | 2.2  | 0.001*     | 0.047          | 0.04     | 0.235      | 0.743 | (0.532, 0.954)  |
| <b>185-5p</b>  | 23250.5   | 11424.1  | 2.0  | 4.3E-05*   | 0.007*         | 0.005*   | 0.207      | 0.833 | (0.670, 0.997)  |
| <b>25-3p</b>   | 21838.8   | 10949.9  | 2.0  | 0.001*     | 0.002*         | 0.006*   | 0.199      | 0.826 | (0.662, 0.991)  |
| <b>21-5p</b>   | 73535.3   | 142796.9 | -2.0 | 2.7E-04*   | 4.2E-05*       | 5.0E-05* | 0.133      | 0.944 | (0.862, 1)      |
| <b>7a-3p</b>   | 82.1      | 176.3    | -2.0 | 0.003*     | 0.005*         | 0.010*   | 0.187      | 0.806 | (0.611, 1)      |
| <b>381-3p</b>  | 190.5     | 397.9    | -2.0 | 0.009*     | 0.012          | 0.012    | 0.220      | 0.799 | (0.620, 0.977)  |
| <b>409-3p</b>  | 1146.9    | 2242.5   | -2.0 | 0.019      | 0.029          | 0.024    | 0.233      | 0.771 | (0.575, 0.967)  |
| <b>7d-3p</b>   | 1050.5    | 1912.9   | -2.0 | 0.005*     | 0.013          | 0.017    | 0.209      | 0.785 | (0.574, 0.996)  |
| <b>323b-3p</b> | 117.3     | 288.3    | -2.4 | 0.004*     | 0.010*         | 0.004*   | 0.199      | 0.840 | (0.665, 1)      |
| <b>328-3p</b>  | 382.5     | 922.5    | -2.5 | 4.6E-06*   | 2.0E-04*       | 2.2E-05* | 0.117      | 0.958 | (0.889, 1)      |
| <b>339-5p</b>  | 90.1      | 234.8    | -2.5 | 1.2E-06*   | 2.0E-04*       | 3.3E-05* | 0.109      | 0.951 | (0.864, 1)      |
| <b>340-5p</b>  | 1536      | 3848.1   | -2.5 | 4.8E-06*   | 1.0E-04*       | 5.0E-05* | 0.134      | 0.944 | (0.858, 1)      |
| <b>126-5p</b>  | 1222.3    | 2947     | -2.5 | 5.6E-06*   | 0.002*         | 0.001*   | 0.150      | 0.896 | (0.767, 1)      |
| <b>130b-5p</b> | 111.9     | 248.9    | -2.5 | 0.007*     | 0.009*         | 0.024    | 0.203      | 0.771 | (0.556, 0.986)  |
| <b>493-5p</b>  | 210       | 514.4    | -2.5 | 0.010*     | 0.015          | 0.028    | 0.221      | 0.764 | (0.561, 0.967)  |
| <b>543</b>     | 223.1     | 753.2    | -3.3 | 2.5E-06*   | 3.0E-04*       | 2.0E-04* | 0.143      | 0.917 | (0.808, 1)      |
| <b>654-3p</b>  | 110.2     | 342.5    | -3.3 | 2.2E-04*   | 0.009*         | 0.006*   | 0.193      | 0.826 | (0.642, 1)      |
| <b>485-3p</b>  | 93.2      | 352.3    | -3.3 | 5.8E-07*   | 1.0E-04*       | 3.3E-05* | 0.123      | 0.951 | (0.876, 1)      |

157  
 158 *Abbreviations: CPM, miRNA counts per million; FC, fold change; error rates estimated*  
 159 *by leave-one-out cross validation; AUROC, area under the receiver operating*  
 160 *characteristic; CI, confidence interval; Significant Benjamini & Hochberg adjusted p-*  
 161 *values are indicated by asterisks.*  
 162  
 163

164

165

166

167

168 ***Functional analysis of dysregulated miRNAs in GBM***

169 We explored biological and canonical pathways associated with exosomal miRNAs  
170 changing in GBM patient sera relative to healthy controls. The identities of 44 miRNAs  
171 ( $p\text{-value}\leq 0.05$  in all three tests; no fold change restriction) were uploaded into the IPA  
172 environment to analyze molecular pathways overrepresented in their targets. The  
173 dysregulated miRNAs target mRNAs that are significantly associated with ‘cancer’  
174 ( $1.96E^{-06} < p\text{-value} < 1.52E^{-16}$ ) and ‘neurological disease’ ( $1.72E^{-06} < p\text{-value} < 8.76E^{-13}$ ) with  
175 around half of targeted mRNAs implicated in GBM ( $p\text{-value}=3.36E^{-12}$ ) and glioma  
176 signaling pathways ( $p\text{-value}=1.25E^{-09}$ ; **Fig. 2-b, Suppl.Fig.1**).

177

178 *Insert Figure 2 here*

179

180 ***Selection of signature miRNA classifiers for preoperative GBM diagnosis***

181 The predictive power of each miRNA was estimated using LR models, in which  
182 individual miRNA expression profiles were used as predictors. ROC curves were  
183 determined and AUROC measures were  $\geq 0.74$  across the 26 dysregulated miRNAs.  
184 The 95% confidence intervals corresponding to AUROC estimates did not contain the  
185 null hypothesis value (AUROC=0.5 for a random prediction) indicating that all 26  
186 miRNAs are statistically accurate univariate diagnostic predictors of GBM (**Table 2;**  
187 **Supp.Fig.2**). *In silico* validation by LOO-CV correctly identified the test sample on  
188 average 83% of the time (range 77–89%). We then used partitioning (70% training and  
189 30% test) and Random Forest multivariate modeling to determine whether expression  
190 patterns of a subset of differentially expressed miRNAs could improve the predictive  
191 power. Using these methods, seven miRNAs (miR-182-5p, miR-328-3p, miR-339-5p,  
192 miR-340-5p, miR-485-3p, miR-486-5p and miR-543) distinguished GBM patients from



193 healthy subjects in more than 75% of the random data partitions and were selected as  
194 the most 'stable' miRNA classifiers (**Fig.3a-b**). The RF model was repeated using all  
195 iterations of the seven most stable miRNAs and achieved an overall predictive power  
196 of 91.7% for classifying GBM patients from healthy controls (**Fig.3c**). The diagnostic  
197 accuracies of all possible combinations of the seven miRNAs were determined using  
198 AUROC measures along with the corresponding 95% confidence intervals (**Fig.3d**;  
199 **Supplementary Table 5**). Strikingly, six miRNA combinations were able to distinguish  
200 GBM patients from healthy controls with perfect accuracy (**Fig. 3e**).

201

202 To assess the temporal stability of the GBM miRNA signature in the same patients, we  
203 tested preoperative sera collected at a GBM recurrence (GBM1 patient relapsed and  
204 required additional surgery after 8 months) and from an earlier GBM lesion (excised 4.6  
205 months before GBM12; **Table 1B**). Using the panel of seven exosomal miRNAs, both  
206 GBM1-*relapse* and GBM12-*prior* were classified as GBM, in line with diagnostic  
207 histopathology. We also tested two independent samples, including a patient diagnosed  
208 with IDH<sup>MUT</sup> GBM (GBM13) and a patient diagnosed with 'high-grade glioma' based on  
209 repeat MRIs and overall survival of 8.1 months (GBM14; see **Table 1B**). Both GBM13  
210 and GBM14 were classified as GBM using the miRNA panel.

211

212 To further test the specificity of the GBM miRNA signature, we assessed its ability to  
213 distinguish GBM patients from additional healthy subjects and non-glioma disease  
214 controls. The panel accurately classified all additional healthy subjects ( $n=9$ ; **Table 1B**) as  
215 well as a patient with ganglioglioma WHO (2016) grade I, a slow-growing, benign brain  
216 tumor with glioneuronal components (GIC-1). Next, we assessed the impact of  
217 neuroinflammatory disease processes on the specificity of our exosomal miRNA panel

218 ability. The bioinformatics analysis above showed that dysregulated miRNAs also target  
219 mRNAs significantly associated with autoimmune rheumatoid arthritis and broadly to  
220 ‘neurological disease’ (**Fig. 2-b**). Our GBM miRNA panel was used to discriminate  
221 patients with the inflammatory autoimmune disease, multiple sclerosis (MS). Sera were  
222 sampled from MS patients with active gadolinium enhancing demyelinating lesions, either  
223 untreated or receiving immunomodulatory therapies ( $n=9$ ; **Table 1B**). All MS patients  
224 were classified as controls, indicating the robustness of our exosomal miRNA signature  
225 for GBM identification.

226 *Insert Figure 3 here*

227

228 *miRNAs dysregulated in IDH-mutant grade II-III gliomas provide additional markers*  
229 *for glioma severity and IDH mutational status*

230 We then compared serum exosome miRNA profiles between IDH<sup>MUT</sup> grade II-III glioma  
231 patients ( $n=10$ ; mean age=42.7) and matched healthy controls ( $n=10$ ; mean age=42.9; see  
232 **Table 1B**) and identified 23 differentially expressed miRNAs (fold change $\geq 2$ ; unadjusted  
233  $p<0.05$  in all three tests; **Supp.Table 4b.**). Of these, 12 miRNAs were shared with the  
234 GBM analysis and showed the same direction of change (**Fig. 4-a**). AUROC curve  
235 measures were  $\geq 0.78$  (average 0.88) across the 23 dysregulated miRNAs, and LOO-CV  
236 correctly identified the test sample on average 83% of the time (range 77–88%;  
237 **Supp.Table 5a.; Supp.Fig. 3a-b**). RF modeling performed on partitioned data selected  
238 miR-7d-3p, miR-98-5p, miR-106b-3p, 130b-5p and 185-5p as the most stable features  
239 for classifying grade II-III glioma patients from healthy participants, with a predictive  
240 power of 75.0% (**Fig. c-1.; Suppl.Fig.3c**). The most stable miRNAs for classifying GII-  
241 III IDH<sup>MUT</sup> from healthy controls were distinct from GBM IDH<sup>WT</sup> signature miRNAs  
242 (**Fig.s 4b-1 and 4b-2**).

243

244 The sncRNA data was further interrogated to ascertain whether a subset of miRNAs  
245 showed potential for distinguishing glioma disease severity or IDH mutational status.  
246 Direct comparisons between GBM IDH<sup>WT</sup> and GII-III IDH<sup>MUT</sup> patients revealed 13  
247 differentially expressed miRNAs (fold change $\geq$ 2; unadjusted  $p$ <0.05 in all three tests;  
248 **(Fig. 4c-1.; Supp.Table 4c)**. AUROC curve measurements were  $\geq$ 0.78 (average 0.84)  
249 across the 13 dysregulated miRNAs and LOO-CV correctly identified the test sample on  
250 average 80% of the time (range 76–86%; **Supp.Table 5b.; Supp.Fig. 4a-b**). Numbers of  
251 significant miRNA were too few to perform partitioning, so a single RF model was  
252 constructed from all 13 dysregulated miRNAs that showed an estimated predictive power  
253 of 77.4% **(Fig. 4c-2.)** Interestingly, three of the top four features that discriminate GBM  
254 IDH<sup>WT</sup> from GII-III IDH<sup>MUT</sup> are members of the GBM miRNA signature (i.e., miR-  
255 543, miR-485-3p and miR-486-3p), changing only in GBM patient sera relative to  
256 healthy participants (indicated by asterisks in **Fig. 4**).

257

258 *Insert Figure 4 here*

259 DISCUSSION

260 Using unbiased high-throughput next generation sequencing and an integrative  
261 bioinformatics pipeline<sup>8</sup>, we have identified differentially expressed serum exosomal  
262 miRNAs that discriminate GBM patients from healthy controls. Machine-learning  
263 approaches on miRNAs were used to examine their individual and shared predictive  
264 abilities for a pre-operative GBM diagnosis via a blood test. Of the 26 differentially  
265 expressed miRNAs in GBM patients' relative to healthy controls, we selected a stable  
266 signature panel of seven miRNAs. Together, expression levels of miR-182-5p, miR-328-  
267 3p, miR-339-5p, miR-340-5p, miR-485-3p, miR-486-5p and miR-543 predicted a

268 preoperative GBM diagnosis with a 91.7% accuracy. Within this multivariate model a  
269 combination of just four miRNAs (miR-182-5p, miR-328-3p miR-485-3p miR-486-5p)  
270 distinguished GBM patients from healthy controls with perfect accuracy (100.0%).

271

272 There have been multiple studies examining ‘free-circulating’ miRNAs in glioma patients  
273 with varying success. A recent meta-analysis of these studies found the specificity and  
274 sensitivity of circulating miRNAs was 0.87 and 0.86, respectively, while noting the large  
275 heterogeneity of circulating miRNAs within the included studies <sup>10</sup>. The heterogeneity is  
276 likely due to differences in data normalization used in qRT-PCR studies, with no  
277 universally accepted endogenous housekeeping control <sup>10</sup>. Interestingly, the majority of  
278 miRNAs identified in our exosomal signature have not been previously identified in ‘free-  
279 circulating’ studies. This is consistent with the notion that exosomes represent a distinct  
280 pathway of nucleic acid release from cells, and contain selectively packaged miRNA  
281 species <sup>5</sup>. We have previously shown the effects of RNase pre-treatment of serum prior to  
282 exosome isolation, as performed in this study, drastically alters the miRNA profiles  
283 identified, presumably due to eradication of co-precipitated ‘free-circulating’ miRNAs <sup>8</sup>.  
284 Moreover, normalization of deep sequencing data is not dependant on comparison to a  
285 reference signal or housekeeping gene, potentially reducing variability in data analysis.

286

287 Functional pathway analysis of mRNA species targeted by exosomal miRNAs  
288 dysregulated in GBM patient sera showed highly significant associations to specific GBM  
289 molecular pathways. This provides confidence that the miRNA biomarkers resolved by  
290 our methods are relevant to this particular disease setting. Previous studies have identified  
291 roles for all seven GBM miRNA classifiers in various aspects of glioma and GBM  
292 biology. miR-182, detected here in significantly higher levels in GBM sera, was proposed

293 as a marker of glioma progression, critical for glioma tumorigenesis, tumor growth and  
294 survival *in vitro*<sup>11,12</sup>, with high miR-182 tissue expression observed in GBM<sup>13</sup> and  
295 associated with poor overall survival<sup>14</sup>. Also in line with observations here, the up-  
296 regulation of miR-486 was shown to promote glioma aggressiveness both *in vitro* and *in*  
297 *vivo*<sup>15</sup>. Exosomal miRNAs identified with lower expression levels in GBM patient sera  
298 are also substantiated by the literature. Functional assays indicate tumor suppressive roles  
299 of miR-328<sup>16</sup>, miR-340<sup>17,18</sup>, miRNA-485-5p<sup>19</sup> and miR-543<sup>20</sup> with low levels observed in  
300 tumor tissues relative to normal brain<sup>16,18-20</sup> and low tissue expression levels significantly  
301 associated to poor patient outcomes<sup>16,18</sup>. While miR-339 (decreased levels in GBM  
302 patients here) was shown to contribute to immune evasion of GBM cells by modulating  
303 T-cell responses<sup>21</sup>, inhibitory roles for miR-339 were reported in acute myeloid  
304 leukemia<sup>22</sup>, hepatocellular carcinoma<sup>23</sup>, gastric<sup>24</sup>, colorectal<sup>25</sup>, breast<sup>26</sup> and ovarian  
305 cancers<sup>27</sup>.

306

307 The GBM miRNA signature was able to accurately classify all additional specimens in  
308 the validation sets (healthy,  $n=9$ ; non-glioma,  $n=10$ ), including patients with gadolinium  
309 enhancing active demyelinating lesions. Tumefactive demyelination is a well-recognized  
310 mimic of GBM<sup>28</sup>. The GBM signature also correctly classified four additional GBM  
311 specimens, including two serial collections from patients within the discovery cohort as  
312 well as two independent patients. This pilot study utilised a relatively small patient group,  
313 and further testing is needed to determine whether the miRNA panel can reliably diagnose  
314 GBM in large, independent patient cohorts. Moreover, the correlation between a positive  
315 GBM classification and tumor burden needs to be addressed. To this end, longitudinal  
316 studies should be pursued to assess whether the GBM miRNA panel can detect time  
317 critical GBM tumor recurrences.

318

319 There is more than one pathological route to a GBM; primary and secondary GBMs are  
320 distinct entities with IDH mutations considered a genetic signpost<sup>29</sup>. The only patients  
321 where early detection of a GBM tumor is likely are arguably those with diffuse and  
322 anaplastic (grade II-III) gliomas who progress with a secondary GBM recurrence  
323 (IDH<sup>MUT</sup>). Accordingly, the identification of reliable and readily accessible circulating  
324 progression markers is an important step towards precision medicine for patients  
325 diagnosed with low grade gliomas. While the GBM miRNA signature was described in  
326 serum exosomes from IDH<sup>WT</sup> GBM patients, it was also able to categorize a patient with  
327 IDH<sup>MUT</sup> GBM (GBM13) from healthy participants. It is worth noting that miRNA  
328 members of the GBM signature panel (specifically, increased miR-182-5p, decreased  
329 miR339-5p and miR-340-5p) were also identified in the IDH<sup>MUT</sup> GII-III comparative  
330 analysis. Whether these miRNA changes are related to IDH mutational status, glioma  
331 grade, or a combination of the two, cannot be delineated here. However, our multivariate  
332 modeling did identify distinct panels of miRNAs for classifying GBM and glioma patients  
333 from their corresponding matched healthy control cohorts. Moreover, three GBM  
334 signature panel miRNAs that were unique to the GBM vs control comparative analysis  
335 (increased miR-486-5p and decreased miR-485-3p and miR-543) were among the top  
336 four features that distinguish GBM IDH<sup>WT</sup> from GII-III IDH<sup>MUT</sup> and therefore, might  
337 be specific for GBM IDH<sup>WT</sup> (indicated by asterisks in **Fig.4**). These encouraging results  
338 demonstrate the potential for exosomal miRNA profiles to be used for glioma subtyping  
339 and grading, including the determination of mutational states. Expansion of these  
340 discovery analyses to include well defined cohorts of glioma subtypes with sufficient *n*,  
341 will likely resolve biomarkers of more nuanced specificity.

342

343

## 344 SUMMARY

345 In summary, we have described a serum exosomal miRNA signature that can accurately  
346 predict a GBM diagnosis, preoperatively. This pilot study demonstrates that exosomal  
347 associated miRNAs have exceptional utility as biomarkers in the glioma disease setting. If  
348 these exosomal biomarkers are able to offer non-invasive, early indications of tumor  
349 progression and/or recurrence, they are likely to have significant clinical utility. These  
350 exciting findings have significant potential to transform current diagnostic paradigms, as  
351 well as provide distinct surrogate endpoints for clinical trials. Assessment of serum  
352 exosomal miRNAs in larger longitudinal cohorts of patients with GBM are required to  
353 definitely determine their utility in clinical practice, and these studies are currently  
354 underway.

355

356

357

358

## 359 METHODS

### 360 *Participants*

361 Serum (1 mL) was accessed from the Neuropathology Tumor and Tissue Bank at Royal  
362 Prince Alfred Hospital, New South Wales, Australia (Sydney Local Health District HREC  
363 approval, X014-0126 & HREC/09RPAH/627). Twenty-six serum specimens were  
364 collected pre-operatively from patients with histologically confirmed glioma tumors,  
365 including 16 with GBM, IDH-wildtype (IDH<sup>WT</sup>) WHO (2016) grade IV, and 10 patients  
366 with grade II-III IDH-mutant (IDH<sup>MUT</sup>) gliomas (refer to **Table 1**; **Supp. Table 1** for more  
367 detailed information). Age- and gender-matched healthy control sera ( $n=16$ ) were used for

368 discovery miRNA analyses. Sera from an additional nine healthy controls and ten non-  
369 glioma patients (including active MS,  $n=9$ , and ganglioglioma,  $n=1$ ) were used to test the  
370 GBM miRNA signature. This study was performed under RPAH, and USYD HREC  
371 approved protocols (#X13-0264 and 2012/1684), and all participants provided written  
372 informed consent. All methods were performed in accordance with the relevant guidelines  
373 and regulations.

374

### 375 ***Exosome purification and characterization***

376 Exosomes were isolated from serum as previously described<sup>8</sup>. Briefly, serum (1 mL from  
377 each subject) was treated with RNase A (37 °C for 10 min; 100 ng/ml; Qiagen,  
378 Australia) before exosome purification by size exclusion chromatography (qEV iZONE  
379 Science). Ten fractions (500 µL) were eluted in PBS, as per manufacturer's instructions.  
380 Fractions 8, 9, and 10 were previously shown to contain purified exosome populations<sup>8</sup>  
381 and were collected and stored at -80 °C. Captured exosomes were characterized in  
382 accordance with the criteria outlined by the International Society for Extracellular  
383 Vesicles (ISEV)<sup>30</sup>. Specifically, we identified more than three exosome-enriched proteins  
384 by mass spectrometry proteome profiling and characterized vesicle heterogeneity using  
385 two technologies, transmission electron microscopy (TEM) and nanoparticle tracking  
386 analysis (NTA).

387

388 *Transmission electron microscopy:* Combined qEV-captured fractions 8-10 were loaded  
389 onto carbon-coated, 200 mesh Cu formvar grids (#GSCU200C; ProSciTech Pty Ltd,  
390 QLD, Australia), fixed (2.5% glutaraldehyde, 0.1 M phosphate buffer, pH7.4), negatively  
391 stained with 2% uranyl acetate for 2 min and dried overnight. Exosomes were visualised  
392 at 40,000 X magnification on a Philips CM10 Biofilter TEM (FEI Company, OR, USA)



393 equipped with an AMT camera system (Advanced Microscopy Techniques, Corp., MA,  
394 USA) at an acceleration voltage of 80 kV.

395

396 *Nanoparticle tracking analysis:* Particle size distributions and concentrations were  
397 measured by NTA software (version 3.0) using the NanoSight LM10-HS (NanoSight Ltd,  
398 Amesbury, UK), configured with a 532-nm laser and a digital camera (SCMOS Trigger  
399 Camera). Video recordings (60 s) were captured in triplicate at 25 frames/s with default  
400 minimal expected particle size, minimum track length, and blur setting, a camera level of  
401 10 and detection threshold of 5.

402

403 *Proteome analysis of exosomal preparations:* Serum exosome fractions 8, 9 and 10 were  
404 prepared for mass spectrometry (MS)-based proteomic analysis. Proteomes were  
405 concentrated using chloroform-methanol precipitation, dissolved in 90% formic acid  
406 (FA), their concentrations estimated at 280 nm using a Nanodrop (ND-1000, Thermo  
407 Scientific, USA) and aliquots dried using vacuum centrifugation. Proteomes were then  
408 processed and quantified as before<sup>31</sup>. Peptides from each fraction were desalted using  
409 C18 ZipTips<sup>TM</sup>, concentrations estimated by Qubit quantitation (Invitrogen), dried by  
410 vacuum centrifugation and re-suspended in 3% acetonitrile (ACN; v/v)/0.1% formic acid  
411 (v/v). Samples (0.5 µg) from exosome elution fractions 8-10 were separated by nanoLC  
412 using an Ultimate nanoRSLC UPLC and autosampler system (Dionex) before analyzed on  
413 a QExactive Plus mass spectrometer (Thermo Electron, Bremen, Germany) as previously  
414 described<sup>31</sup>. MS/MS data were analyzed using Mascot (Matrix Science, London, UK;  
415 v2.4.0) with a fragment ion mass tolerance of 0.1 Da and a parent ion tolerance of 4.0  
416 PPM. Peak lists were searched against a SwissProt database (2017\_11), selected for  
417 *Homo sapiens*, trypsin digestion, max. 2 missed cleavages, and variable modifications

418 methionine oxidation and cysteine carbamidomethylation. Exosome proteins were  
419 annotated using Vesiclepedia (<http://microvesicles.org>)<sup>32</sup> and Functional Enrichment  
420 Analysis Tool (FunRich; v2.1.2; <http://funrich.org>)<sup>33</sup>.

421

#### 422 ***RNA extraction and small RNA sequencing***

423 Serum exosomes were processed for RNA extraction using the Plasma/Serum Circulating  
424 & Exosomal RNA Purification Mini Kit (Norgen Biotek, Cat. 51000) according to the  
425 manufacturer's protocol. Extracted total RNA samples were analyzed with a Eukaryote  
426 Total RNA chip on an Agilent 2100 Bioanalyser (Agilent Technologies, United States) to  
427 confirm sufficient yield, quality and size of RNA. Exosome RNA sequencing libraries  
428 were then constructed using the NEBNext Multiplex Small RNA Library Prep Kit for  
429 Illumina (BioLabs, New England) according to the manufacturer's instructions. Yield and  
430 size distribution of resultant libraries were validated using Agilent 2100 Bioanalyzer on a  
431 High-sensitivity DNA Assay (Agilent Technologies, United States). Libraries were then  
432 pooled with an equal proportion for multiplexed sequencing on Illumina HiSeq. 2000  
433 System at the Ramaciotti Centre for Genomics.

#### 434 ***Data pre-processing, differential expression analysis and pathway analysis***

435 Data pre-processing was performed using a pipeline comprising of adapter trimming  
436 (cutadapt), followed by genome alignment to human genome hg 19 using Bowtie (18 bp  
437 seed, 1 error in seed, quality score sum of mismatches<70). Where multiple best strata  
438 alignments existed, tags were randomly assigned to one of those coordinates. Tags were  
439 annotated against mirBase 20 and filtered for at most one base error within the tag. Counts  
440 for each miRNA were tabulated and adjusted to counts per million miRNAs passing the  
441 mismatch filter. All samples achieved miRNA read counts >45,000 read counts and  
442 miRNAs with low abundance (<50 read counts across more than 20% of samples) were

443 removed. Differential expression analysis was performed using three different statistical  
444 hypothesis tests including a non-parametric two-sample Wilcoxon test and two parametric  
445 tests- Student's *t*-test, and an Exact test (implemented in Bioconductor EdgeR), which  
446 tests for differences between the means of two groups of negative-binomially distributed  
447 counts. Benjamini & Hochberg adjusted *p*-values were also calculated. Data pre-  
448 processing and differential expression analysis were performed using Bioconductor and R  
449 statistical packages. Pathway analysis was performed using Ingenuity® software  
450 (Ingenuity Systems, USA; <http://analysis.ingenuity.com>). MicroRNA target filters were  
451 applied to significant, differentially expressed miRNAs (unadjusted *p*-value $\leq$ 0.05 in all  
452 three statistical methods) and mRNA target lists were generated based on highly predicted  
453 or experimentally observed confidence levels. Core expression analyses were performed  
454 with default criteria to determine the most significant functional associations (biological  
455 and canonical pathways) of mRNAs targeted by dysregulated miRNAs.

456

#### 457 *Univariate analysis*

458 We performed logistic regression (LR) and receiver operator characteristic (ROC)  
459 analysis to assess the predictive power of individual miRNAs between the two groups of  
460 interest. LR was used to identify linear predictive models with each miRNA as the  
461 univariate predictor. The quality of each model was depicted by the corresponding ROC  
462 curve, which plots the true positive rate (i.e., sensitivity) against the false-positive rate  
463 (i.e., 1-specificity). The area under the ROC curve (AUROC) was then computed as a  
464 measure of how well each LR model can distinguish between two diagnostic groups. The  
465 95% confidence intervals (CI) of AUROC measures were estimated using Delong  
466 method<sup>34</sup> to assess the significance of a model's predictive power as compared to a  
467 random trial (i.e., AUROC = 0.5). We then used leave-one-out cross-validation (LOO-

468 CV) to estimate the prediction errors of the LR models. LOO-CV learns the model on all  
469 samples except one and tests the learnt model on the left-out sample. The process is  
470 repeated for each sample and the error rate is the proportion of misclassified samples.  
471 Overall, cross validation is a powerful model validation technique for assessing how the  
472 results of a statistical analysis can be generalized to an independent dataset<sup>35</sup>. These  
473 analyses were performed using R stats (glm) and boot (cv.glm) packages.

474

### 475 ***Multivariate Analysis***

476 To assess the predictive power of multiple miRNAs as disease signatures, samples were  
477 first randomly partitioned into two disjoint sets of *discovery* (70% of samples) and  
478 *validation* (30% of samples). MiRNAs differentially expressed in the discovery set (i.e.,  
479 changes increased or decreased by fold change $\geq 2$  and unadjusted  $p$ -value $\leq 0.05$  in all three  
480 statistical hypothesis tests) were then selected as features/predictors of *Random Forest*  
481 (RF) multivariate predictive model. RF is a multivariate nonlinear classifier that operates  
482 by constructing a multitude of decision trees at training time in order to correct for the  
483 overfitting problem<sup>36</sup>. RF was trained on the *discovery* set and the resultant predictive  
484 model was then used to predict GBM or GII-III patients *versus* healthy controls based on  
485 the read count values of identified miRNAs in *validation* samples. For statistical rigour, to  
486 account for random partitioning of the samples into discovery and validation sets, the  
487 whole process was repeated 100 times. We then chose *stable* miRNAs—i.e., those  
488 identified to be differentially expressed in more than 75% of iterations—as predictors of  
489 an RF model using all samples and the AUROC with 95% CI as well as out-of-bag  
490 (OOB) error was reported as an unbiased estimates of the model predictive power. The  
491 ‘*importance*’ or relative contribution of each feature (differentially expressed miRNAs) in  
492 the RF performance was then estimated based on the ‘*mean decrease accuracy*’ measure

493 as discussed in<sup>37</sup>. All analyses were performed using R ‘caret’ and ‘RandomForest’  
494 packages.

495

496 ***Data Availability***

497 Exosomal miRNA raw data *will be* accessible at NCBI Gene Expression Omnibus  
498 (GEO; *accession number to be provided*). In the interim, the miRNA sequencing data is  
499 available at: [https://github.com/VafaeLab/glioblastoma\\_exosomal\\_miR\\_markers](https://github.com/VafaeLab/glioblastoma_exosomal_miR_markers).

500 Normalised data used for statistical analysis is provided in Supplementary Table 3.

501

502

503

504

505 *Acknowledgements:* Many thanks to the wonderful and dedicated staff at RPAH, with  
506 special thanks to Mary Lordan, Jane Raftesath, Audrey Caudon, Shu Wang and Ladan  
507 Noroozi.

508

509 *Conflict of Interest:* The authors declare that they have no competing interests.

510

511 *Contributions:* All authors contributed to manuscript preparation and approve the  
512 submission of the work presented here. Specific contributions are as follows: S.E.  
513 performed technical work including serum processing, exosome purification, electron  
514 microscopy, small RNA sequencing, data analysis, manuscript preparation. F.V. and P.Y.  
515 developed and performed the bioinformatics analytical pipeline. S.H. performed technical  
516 work including serum processing, nanosight particle tracking, and mass spectrometry.  
517 H.W and M.Y.T.L characterized clinical cases, including molecular characterizations of

518 tumour tissue. L.S and B.S assisted with clinical sample procurement and case  
519 characterization. C.M.S. assisted with small RNA sequencing protocols and data  
520 interpretation. M.E.B. provided experimental design and data interpretation. K.L.K  
521 provided experimental design, cohort characterisation, proteomics methods,  
522 bioinformatics, data interpretation and presentation. M.E.B and K.L.K are guarantors of  
523 this work.

524

525 *Funding:* This work was supported by grants provided by Brainstorm, Brain Foundation  
526 and Pratten Foundation as well as career support from Australian Postgraduate Awards  
527 (S.E. and S. H.), Australian Rotary Health Postgraduate Award (S. H.), and Cancer  
528 Institute New South Wales (K.L.K.).

529 REFERENCES:

- 530 1 Ellingson, B. M., Wen, P. Y. & Cloughesy, T. F. Modified Criteria for  
531 Radiographic Response Assessment in Glioblastoma Clinical Trials.  
532 *Neurotherapeutics : the journal of the American Society for Experimental*  
533 *NeuroTherapeutics* **14**, 307-320, doi:10.1007/s13311-016-0507-6 (2017).
- 534 2 Saadatpour, L. *et al.* Glioblastoma: exosome and microRNA as novel diagnosis  
535 biomarkers. *Cancer gene therapy* **23**, 415-418, doi:10.1038/cgt.2016.48 (2016).
- 536 3 Skog, J. *et al.* Glioblastoma microvesicles transport RNA and proteins that  
537 promote tumour growth and provide diagnostic biomarkers. *Nature cell biology*  
538 **10**, 1470-1476, doi:10.1038/ncb1800 (2008).
- 539 4 Mallawaarachy, D. M. *et al.* Comprehensive proteome profiling of glioblastoma-  
540 derived extracellular vesicles identifies markers for more aggressive disease. *J*  
541 *Neurooncol* **131**, 233-244, doi:10.1007/s11060-016-2298-3 (2017).
- 542 5 Li, C. C. *et al.* Glioma microvesicles carry selectively packaged coding and non-  
543 coding RNAs which alter gene expression in recipient cells. *RNA biology* **10**,  
544 1333-1344, doi:10.4161/rna.25281 (2013).
- 545 6 Akers, J. C. *et al.* MiR-21 in the extracellular vesicles (EVs) of cerebrospinal fluid  
546 (CSF): a platform for glioblastoma biomarker development. *PloS one* **8**, e78115,  
547 doi:10.1371/journal.pone.0078115 (2013).
- 548 7 Manterola, L. *et al.* A small noncoding RNA signature found in exosomes of  
549 GBM patient serum as a diagnostic tool. *Neuro-oncology* **16**, 520-527,  
550 doi:10.1093/neuonc/not218 (2014).
- 551 8 Ebrahimkhani, S. *et al.* Exosomal microRNA signatures in multiple sclerosis  
552 reflect disease status. *Scientific reports* **7**, 14293, doi:10.1038/s41598-017-14301-  
553 3 (2017).
- 554 9 Roberts, T. C. The MicroRNA Biology of the Mammalian Nucleus. *Molecular*  
555 *therapy. Nucleic acids* **3**, e188, doi:10.1038/mtna.2014.40 (2014).
- 556 10 Ma, C. *et al.* A comprehensive meta-analysis of circulation miRNAs in glioma as  
557 potential diagnostic biomarker. *PLoS One* **13**, e0189452,  
558 doi:10.1371/journal.pone.0189452 (2018).
- 559 11 Hailin, T. *et al.* The miR-183/96/182 Cluster Regulates Oxidative Apoptosis and  
560 Sensitizes Cells to Chemotherapy in Gliomas. *Current Cancer Drug Targets* **13**,  
561 221-231, doi:<http://dx.doi.org/10.2174/1568009611313020010> (2013).
- 562 12 Xue, J. *et al.* miR-182-5p Induced by STAT3 Activation Promotes Glioma  
563 Tumorigenesis. *Cancer research* **76**, 4293-4304, doi:10.1158/0008-5472.CAN-15-  
564 3073 (2016).
- 565 13 Kouri, F. M. *et al.* miR-182 integrates apoptosis, growth, and differentiation  
566 programs in glioblastoma. *Genes & Development* **29**, 732-745,  
567 doi:10.1101/gad.257394.114 (2015).

- 568 14 Jiang, L. *et al.* miR-182 as a Prognostic Marker for Glioma Progression and  
569 Patient Survival. *The American Journal of Pathology* **177**, 29-38,  
570 doi:10.2353/ajpath.2010.090812 (2010).
- 571 15 Song, L. *et al.* miR-486 sustains NF- $\kappa$ B activity by disrupting multiple NF- $\kappa$ B-  
572 negative feedback loops. *Cell Research* **23**, 274-289, doi:10.1038/cr.2012.174  
573 (2013).
- 574 16 Yuan, J. *et al.* microRNA-328 is a favorable prognostic marker in human glioma  
575 via suppressing invasive and proliferative phenotypes of malignant cells.  
576 *International Journal of Neuroscience* **126**, 145-153,  
577 doi:10.3109/00207454.2014.1002610 (2016).
- 578 17 Li, X. *et al.* miR-340 inhibits glioblastoma cell proliferation by suppressing  
579 CDK6, cyclin-D1 and cyclin-D2. *Biochemical and Biophysical Research*  
580 *Communications* **460**, 670-677, doi:<https://doi.org/10.1016/j.bbrc.2015.03.088>  
581 (2015).
- 582 18 Huang, D. *et al.* miR-340 suppresses glioblastoma multiforme. *Oncotarget* **6**,  
583 9257-9270 (2015).
- 584 19 Yu, J., Wu, S.-W. & Wu, W.-P. A tumor-suppressive microRNA, miRNA-485-5p,  
585 inhibits glioma cell proliferation and invasion by down-regulating TPD52L2.  
586 *American Journal of Translational Research* **9**, 3336-3344 (2017).
- 587 20 Xu, L. *et al.* miR-543 functions as a tumor suppressor in glioma in vitro and in  
588 vivo. *Oncology Reports* **38**, 725-734, doi:10.3892/or.2017.5712 (2017).
- 589 21 Ueda, R. *et al.* Dicer-regulated microRNAs 222 and 339 promote resistance of  
590 cancer cells to cytotoxic T-lymphocytes by down-regulation of ICAM-1.  
591 *Proceedings of the National Academy of Sciences of the United States of America*  
592 **106**, 10746-10751, doi:10.1073/pnas.0811817106 (2009).
- 593 22 Barrera-Ramirez, J. *et al.* Micro-RNA Profiling of Exosomes from Marrow-  
594 Derived Mesenchymal Stromal Cells in Patients with Acute Myeloid Leukemia:  
595 Implications in Leukemogenesis. *Stem Cell Reviews* **13**, 817-825,  
596 doi:10.1007/s12015-017-9762-0 (2017).
- 597 23 Wang, Y.-L., Chen, C.-m., Wang, X.-M. & Wang, L. Effects of miR-339-5p on  
598 invasion and prognosis of hepatocellular carcinoma. *Clinics and Research in*  
599 *Hepatology and Gastroenterology* **40**, 51-56,  
600 doi:<https://doi.org/10.1016/j.clinre.2015.05.022> (2016).
- 601 24 Shen, B. *et al.* MicroRNA - 339, an epigenetic modulating target is involved in  
602 human gastric carcinogenesis through targeting NOVA1. *FEBS Letters* **589**, 3205-  
603 3211, doi:10.1016/j.febslet.2015.09.009 (2015).
- 604 25 Zhou, C., Lu, Y. & Li, X. miR-339-3p inhibits proliferation and metastasis of  
605 colorectal cancer. *Oncology Letters* **10**, 2842-2848, doi:10.3892/ol.2015.3661  
606 (2015).



- 607 26 Wu, Z.-s. *et al.* MiR-339-5p inhibits breast cancer cell migration and invasion in  
608 *vitro* and may be a potential biomarker for breast cancer prognosis. *BMC Cancer*  
609 **10**, 542-542, doi:10.1186/1471-2407-10-542 (2010).
- 610 27 Shan, W., Li, J., Bai, Y. & Lu, X. miR-339-5p inhibits migration and invasion in  
611 ovarian cancer cell lines by targeting NACC1 and BCL6. *Tumor Biology* **37**,  
612 5203-5211, doi:10.1007/s13277-015-4390-2 (2016).
- 613 28 Riva, D. *et al.* A case of pediatric tumefactive demyelinating lesion misdiagnosed  
614 and treated as glioblastoma. *J Child Neurol* **23**, 944-947,  
615 doi:10.1177/0883073808315419 (2008).
- 616 29 Ohgaki, H. & Kleihues, P. The Definition of Primary and Secondary  
617 Glioblastoma. *Clinical Cancer Research* **19**, 764-772, doi:10.1158/1078-  
618 0432.Ccr-12-3002 (2013).
- 619 30 Lotvall, J. *et al.* Minimal experimental requirements for definition of extracellular  
620 vesicles and their functions: a position statement from the International Society for  
621 Extracellular Vesicles. *Journal of extracellular vesicles* **3**, 26913,  
622 doi:10.3402/jev.v3.26913 (2014).
- 623 31 Mallawaarachy, D. M. *et al.* Membrane proteome analysis of glioblastoma cell  
624 invasion. *J Neuropathol Exp Neurol* **74**, 425-441,  
625 doi:10.1097/NEN.000000000000187 (2015).
- 626 32 Kalra, H. *et al.* Vesiclepedia: a compendium for extracellular vesicles with  
627 continuous community annotation. *PLoS biology* **10**, e1001450,  
628 doi:10.1371/journal.pbio.1001450 (2012).
- 629 33 Pathan, M. *et al.* FunRich: An open access standalone functional enrichment and  
630 interaction network analysis tool. *Proteomics*, doi:10.1002/pmic.201400515  
631 (2015).
- 632 34 DeLong, E. R., DeLong, D. M. & Clarke-Pearson, D. L. Comparing the areas  
633 under two or more correlated receiver operating characteristic curves: a  
634 nonparametric approach. *Biometrics* **44**, 837-845 (1988).
- 635 35 Seni, G. & Elder, J. F. Ensemble Methods in Data Mining: Improving Accuracy  
636 Through Combining Predictions. *Synthesis Lectures on Data Mining and*  
637 *Knowledge Discovery* **2**, 1-126, doi:10.2200/s00240ed1v01y200912dmk002  
638 (2010).
- 639 36 Hastie, T., Robert, T. & Friedman, J. *Elements of Statistical Learning: data*  
640 *mining, inference, and prediction.* (Springer, 2008).
- 641 37 Breiman, L. Random Forests. *Machine Learning* **45**, 5-32,  
642 doi:10.1023/A:1010933404324 (2001).  
643  
644  
645

646 FIGURE LEGENDS

647 **Figure 1.** Characterization of serum exosomes isolated in fractions 8-10 by size exclusion  
648 chromatography prior to miRNA sequencing. **(a.)** Size distribution of particles as  
649 analyzed by nanoparticle tracking analysis. **(b.)** Transmission electron microscopy  
650 allowed visualization of vesicles with sizes ranging from 60-110 nm in diameter, scale  
651 bars = 500 nm **(b-1., wide field)** and 200 nm **(b-2., close-up)**. **(c-1.)** Mass spectrometry-  
652 based proteome analysis of size chromatographic elution fractions 8-10 identified all top  
653 10 exosome marker proteins and **(c-2.)** showed significant enrichment of proteins  
654 characteristic of exosomes and blood microparticles. Proteins identified in fractions 8-10  
655 showed limited, non-significant associations to compartments like the nucleolus, where  
656 certain miRNA species are concentrated. **(d.)** Bioanalyzer trace of RNA extracted from  
657 serum exosomes shows the main population of small RNA and no ribosomal RNA.

658

659 **Figure 2. (a.)** Hierarchical clustering of 26 differentially expressed miRNAs shows  
660 clear separation of glioblastoma (GBM) patients and healthy control (HC) exosomal  
661 profiles (fold change  $\geq 2$  or  $\leq 0.5$ ; unadjusted  $p$ -values  $\leq 0.05$  in all three statistical tests).  
662 **(b.)** Functional pathway analysis of mRNAs targeted by 44 significantly changing  
663 miRNA (unadjusted  $p$ -values  $\leq 0.05$  in all three statistical tests) in GBM circulating  
664 exosomes. Top canonical pathways, diseases and disorders and molecular and cellular  
665 functions are listed with the numbers of overlapping molecules and significance of  
666 associations (right-tailed Fisher exact test,  $p$ -value).

667

668 **Figure 3. (a.)** miRNAs appearing in  $>75$  of 100 partitions (70% training set, 30% test set)  
669 were selected as the most stable miRNA classifiers by Random Forest modeling  
670 (frequencies are specified in brackets). **(b.)** Box-and-whisker plots and receiver operator

671 characteristic curves with area under the curve (AUROC) calculations demonstrate the  
672 individual discriminatory power of the seven most stable miRNA classifiers. **(c.)** miRNAs  
673 were ordered by the importance of their contribution to discriminating GBM from  
674 [healthy] controls; overall out-of-the-bag (OOB) error rate of the seven features was  
675 8.33%. **(d.)** AUROC measures of all possible combinations of the seven miRNAs  
676 previously identified to be the most stable predictors, stratified by the number of  
677 miRNAs (signature size) and their distributions and displayed as violin plots. **(e.)**  
678 miRNA signatures that discriminate between GBM and healthy controls with the  
679 perfect accuracy.

680

681 **Figure 4. (a.)** A Venn diagram summarizes the differentially expressed miRNAs between  
682 IDH<sup>MUT</sup> glioma tumor grades II-III (GII-III;  $n=10$ ), IDH<sup>WT</sup> glioblastoma (GBM;  $n=12$ )  
683 and corresponding age- and gender-matched healthy controls (HC; fold change  $\geq 2$  or  $\leq 0.5$ ;  
684 unadjusted  $p$ -values  $\leq 0.05$  in all three statistics tests, i.e., Exact,  $t$ -test and Wilcoxon), with  
685 12 overlapping differentially expressed miRNAs. Decreased expression is indicated in  
686 blue and increased expression in red. The most stable miRNAs for classifying **(b-1.)**  
687 GII-III IDH<sup>MUT</sup> and **(b-2.)** GBM IDH<sup>WT</sup> from HCs are listed and show distinct features.  
688 **(c-1.)** Summary of differentially expressed miRNAs between the GBM IDH<sup>WT</sup> and GII-  
689 III IDH<sup>MUT</sup> cohorts and **(c-2.)** plot of ‘importance’ of each individual miRNA for  
690 discriminating GBM from GII-III; out-of-the-bag (OOB) error rate is 22.73%. Three of  
691 the top four features that distinguish GBM IDH<sup>WT</sup> from GII-III IDH<sup>MUT</sup> were only  
692 identified in the GBM vs. HC comparative analysis, are members of the GBM miRNA  
693 signature that together accurately classify GBMs from HCs and may be specific  
694 markers for GBM (indicated by asterisks in **a., b-2., c-1., and c-2.**).

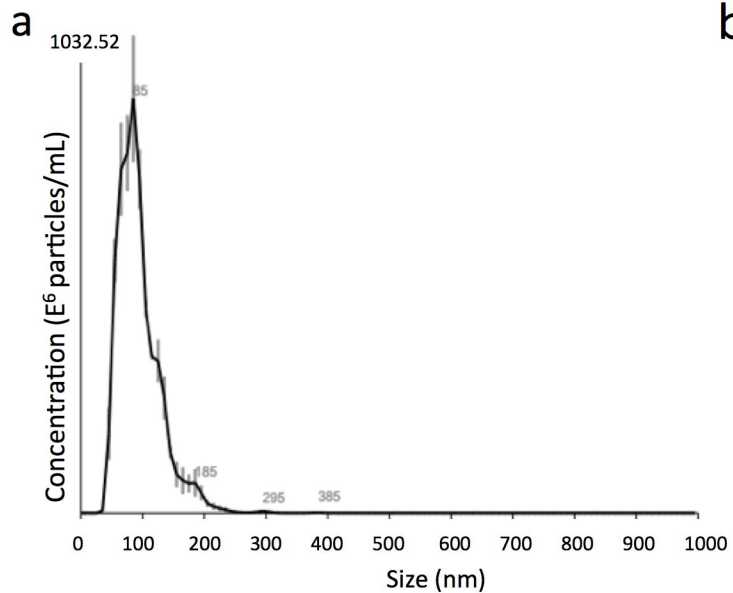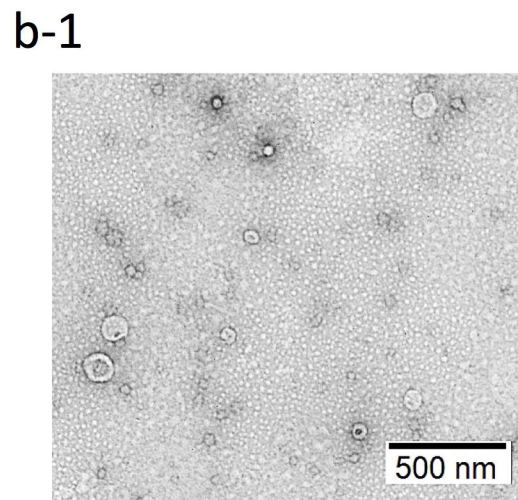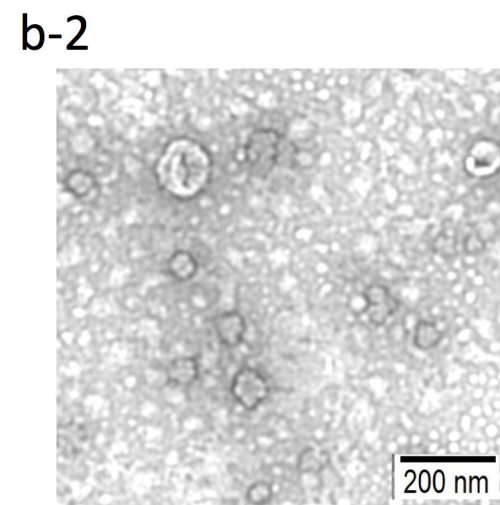

**c-1**

|    | Gene Symbol | F8 | F9 | F10 |
|----|-------------|----|----|-----|
| 1  | CD9         |    |    |     |
| 2  | HSPA8       |    |    |     |
| 3  | PDCD6IP     |    |    |     |
| 4  | GAPDH       |    |    |     |
| 5  | ACTB        |    |    |     |
| 6  | ANXA2       |    |    |     |
| 7  | CD63        |    |    |     |
| 8  | SDCBP       |    |    |     |
| 9  | ENO1        |    |    |     |
| 10 | HSP90AA1    |    |    |     |

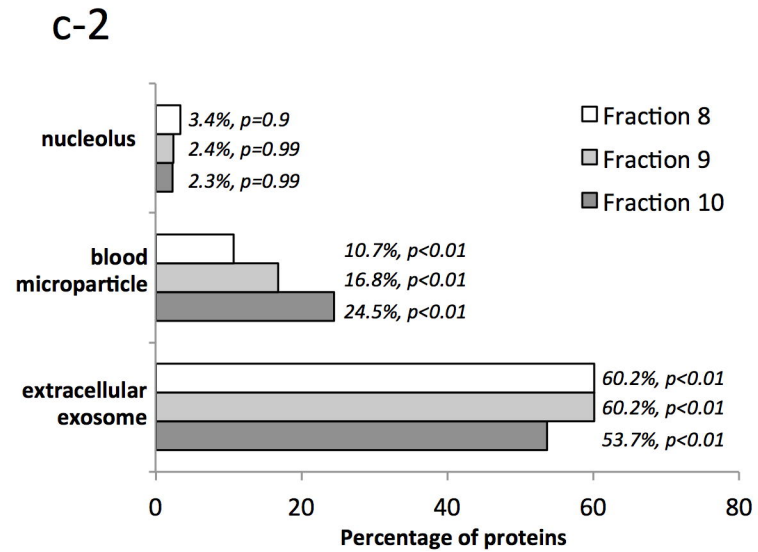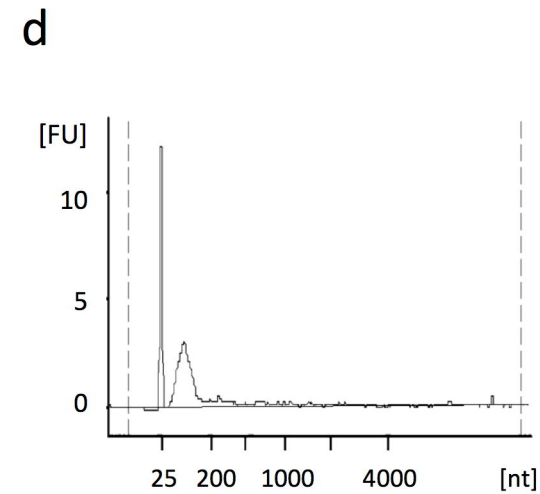

a.

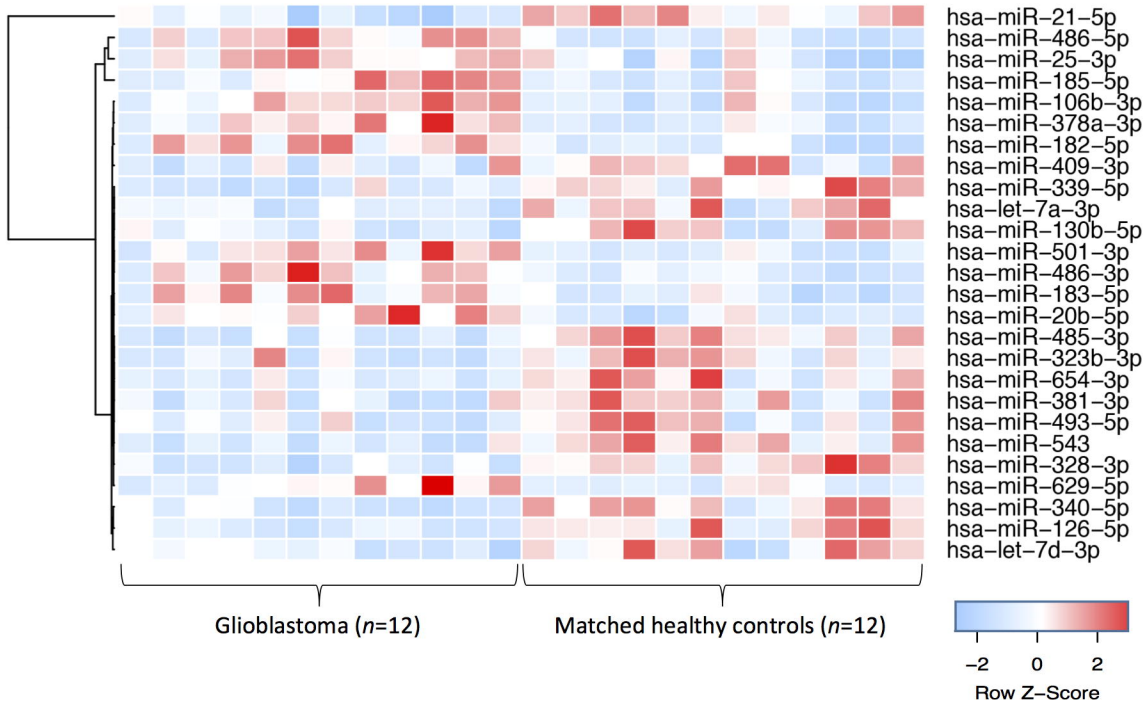

b.

| <u>Top canonical pathways</u>                                                | <u>p-value</u>      | <u>Overlap</u>    |
|------------------------------------------------------------------------------|---------------------|-------------------|
| Molecular mechanisms of cancer                                               | 2.16E-12            | 39.2% (152/388)   |
| <b>Glioblastoma multiforme signaling</b>                                     | 3.36E-12            | 48.4% 78/161)     |
| Pancreatic adenocarcinoma signaling                                          | 6.07E-11            | 50.8% (61/120)    |
| Role of macrophages, fibroblasts & endothelial cells in Rheumatoid arthritis | 4.37E-10            | 39.3% (119/303)   |
| <b>Glioma signaling</b>                                                      | 1.25E-09            | 49.6% (56/113)    |
| <u>Diseases and disorders</u>                                                |                     |                   |
|                                                                              | <u>p-value</u>      | <u>#Molecules</u> |
| <b>Cancer</b>                                                                | 1.96E-06 - 1.52E-16 | 4322              |
| Organismal injury and abnormalities                                          | 1.97E-06 - 2.97E-13 | 4371              |
| <b>Neurological disease</b>                                                  | 1.72E-06 - 8.76E-13 | 785               |
| Tumor morphology                                                             | 1.96E-06 - 2.81E-12 | 366               |
| Developmental disorder                                                       | 1.39E-06 - 3.49E-12 | 601               |
| <u>Molecular and cellular functions</u>                                      |                     |                   |
|                                                                              | <u>p-value</u>      | <u>#Molecules</u> |
| Cell death and survival                                                      | 2.13E-06 - 8.28E-17 | 1469              |
| Gene expression                                                              | 8.34E-07 - 1.67E-15 | 1010              |
| Cellular growth and proliferation                                            | 1.92E-06 - 5.23E-15 | 1466              |
| Cell cycle                                                                   | 2.01E-06 - 6.25E-15 | 671               |
| Cellular development                                                         | 1.92E-06 - 1.51E-14 | 1579              |

a. miRNAs with frequencies of >75% in training set

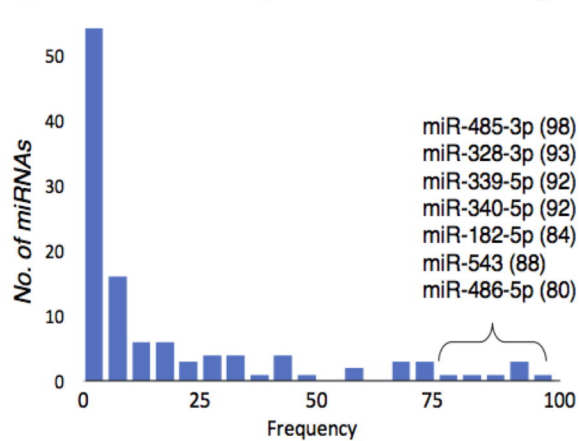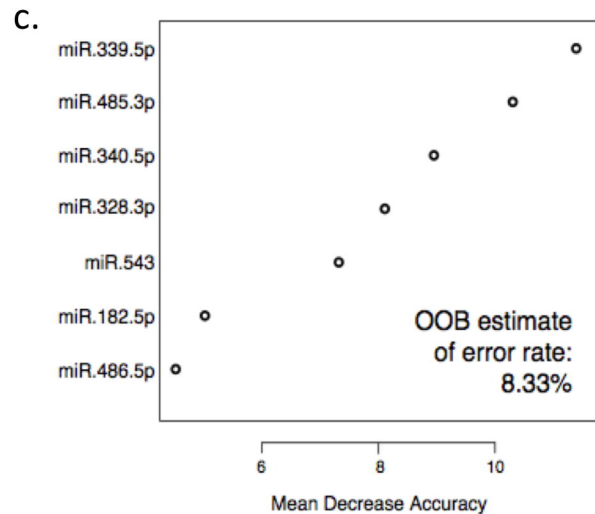

b.

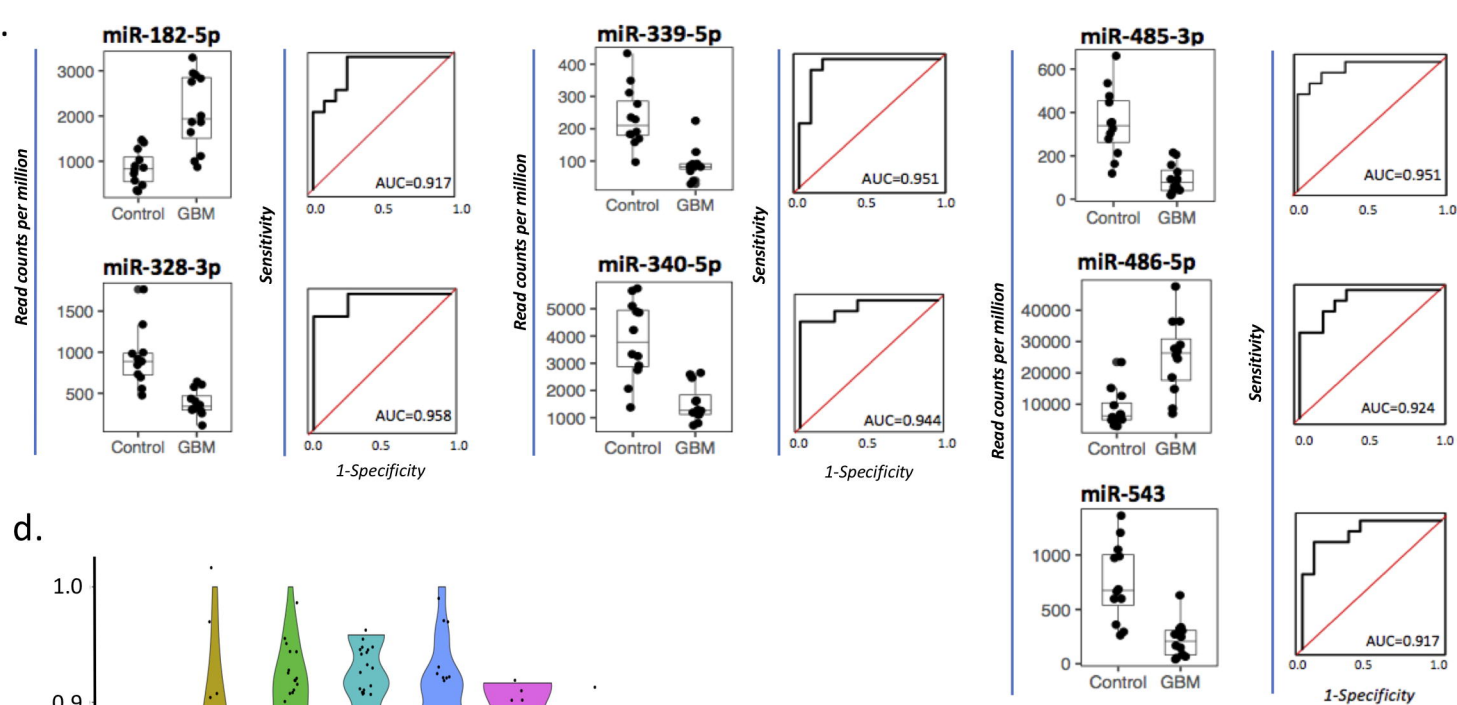

d.

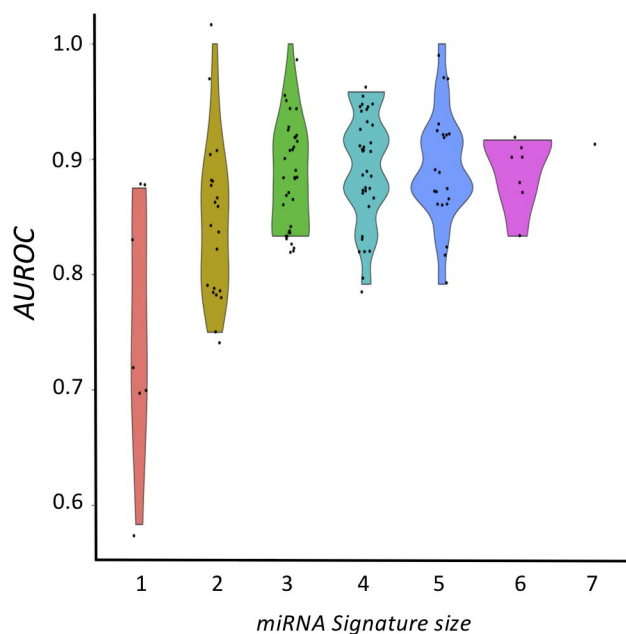

e.

| Signature Size | Signature miRNA composition                                                 |
|----------------|-----------------------------------------------------------------------------|
| 2              | hsa-miR-328-3p, hsa-miR-485-3p                                              |
| 2              | hsa-miR-485-3p, hsa-miR-340-5p                                              |
| 3              | hsa-miR-182-5p, hsa-miR-328-3p, hsa-miR-485-3p                              |
| 3              | hsa-miR-485-3p, hsa-miR-339-5p, hsa-miR-340-5p                              |
| 4              | hsa-miR-543, hsa-miR-328-3p, hsa-miR-485-3p, hsa-miR-340-5p                 |
| 5              | hsa-miR-543, hsa-miR-182-5p, hsa-miR-485-3p, hsa-miR-339-5p, hsa-miR-340-5p |

a.

GII-III, IDH<sup>MUT</sup>  
vs. HC

GBM, IDH<sup>WT</sup>  
vs. HC

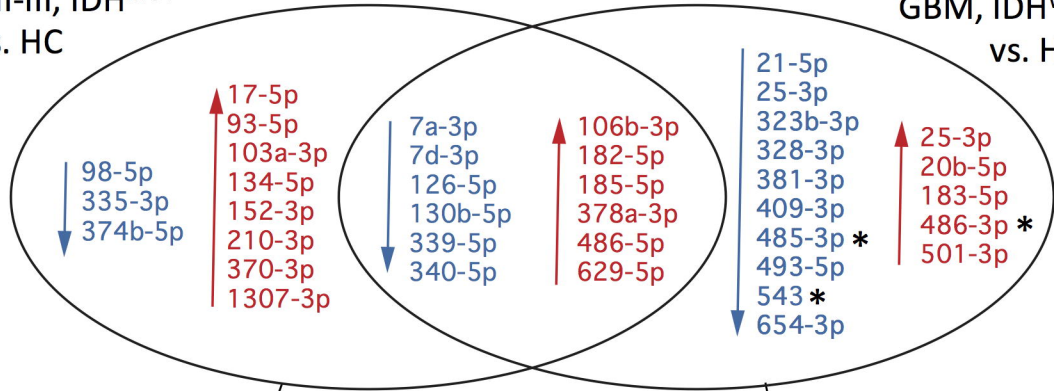

b-1.

Stable classifiers  
Glioma Grade II-III, IDH<sup>MUT</sup>:

- miR-7d-3p
- miR-106b-3p
- miR-130b-5p
- miR-185-5p
- miR-98-5p

b-2.

Stable classifiers  
Glioblastoma, IDH<sup>WT</sup>:

- miR-182-5p
- miR-328-3p
- miR-339-5p
- miR-340-5p
- miR-485-3p\*
- miR-486-5p\*
- miR-543\*

Important features distinguish  
GBM IDH<sup>WT</sup> from GII-III IDH<sup>MUT</sup>

c-1.

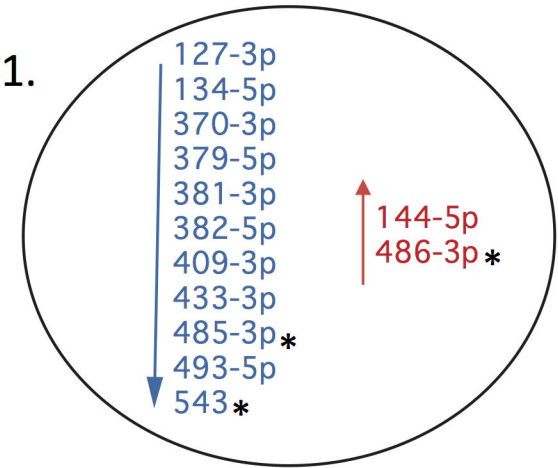

c-2.

Importance of features, GBM vs. GII-III

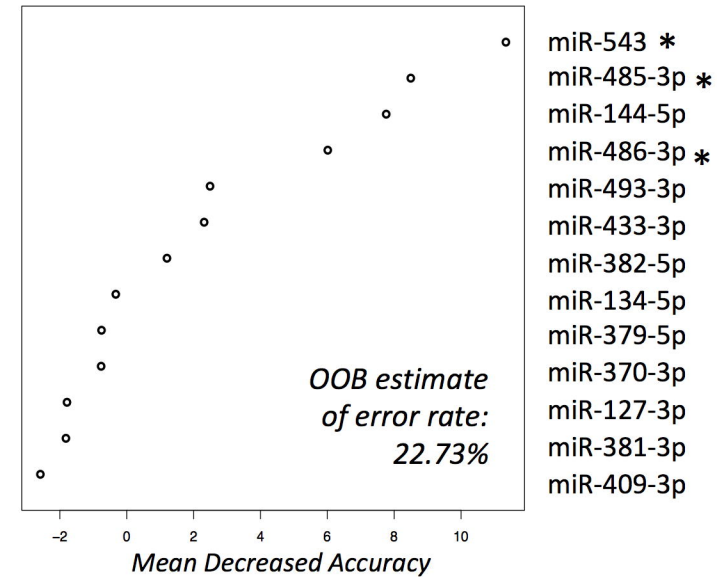

Source: https://www.biorxiv.org/content/10.1101/342154v2.full.pdf
